# Supplementary material for: Sulfonic acid-functionalized PCP(Cr) catalysts with Cr3+ and –SO3H sites for 5-ethoxymethylfurfural production from glucose
Source: Royal Society of Chemistry journal article supplement (doi:10.1039/d1ra05103b), 2021-01-01
Supplement: d1ra05103b1.pdf [file d1ra05103b1.pdf]

## Electronic supplementary information

### Sulfonic acid-functionalized PCP(Cr) catalysts with Cr<sup>3+</sup> and -SO<sub>3</sub>H sites for 5-Ethoxymethylfurfural production from glucose

Luxin Zhang, Yuting Liu, Ruijun Sun, Simin Yi

College of Environmental and Municipal Engineering, Shaanxi Key Laboratory of Environmental Engineering, Key Lab of Northwest Water Resource, Environment and Ecology, MOE, Xi'an University of Architecture and Technology, Xi'an 710055, P.R. China

\*E-mail addresses: zhangluxinxx@126.com (L. Zhang). Fax/Tel: +86 29 82205652

#### Typical experimental procedure for the production of EMF from glucose

In a typical run, anhydrous ethanol (2 mL), glucose (20 mg), PCP(Cr)-BA or PCP(Cr)-NA (10 mg) were added to a 15 mL thick-walled glass reactor. The reactor was then immersed into a preheated oil bath with magnetic stirring, and the reaction mixture was stirred for a given reaction time at various temperatures. After reaching the target reaction time, the reaction was quenched by introducing the reactor into a cooled water bath. The sample was then diluted, filtered, and further employed for product analysis.

#### Determination of the products

Quantitative analysis of HMF and EMF was performed by a LC-2010AHT HPLC instrument from Shimadzu Corp., Japan, using an XDB-C18 column maintained at 30°C with an ultraviolet detector at 280 nm. Water/acetonitrile with a volume ratio of 85:15 was used as the mobile phase at a flow rate of 1.0 mL min<sup>-1</sup>. The concentrations of ethyl levulinate (EL) were determined by a gas chromatograph equipped with DB-FFAP column and flame ionization detector (FID). The injection temperature was 270 °C. The temperature of the column was maintained at 90 °C for 3 min and then raised to 210 °C with a ramp rate of 10°C min<sup>-1</sup>. Product yields were calculated on a molar basis.

From glucose to EMF: product yields were calculated on a molar basis as follows:

$$\text{HMF yield (mol\%)} = \frac{\text{moles of HMF produced}}{\text{moles of starting glucose}} \times 100$$

$$\text{EMF yield (mol\%)} = \frac{\text{moles of EMF produced}}{\text{moles of starting glucose}} \times 100$$

$$\text{EL yield (mol\%)} = \frac{\text{moles of EL produced}}{\text{moles of starting glucose}} \times 100$$
